# Supplementary material for: Synergistic Effects of Limosilactobacillus fermentum ASBT-2 with Oxyresveratrol Isolated from Coconut Shell Waste
Source: MDPI journal article supplement (doi:10.3390/foods10112548), 2021-10-22
Supplement: s1 [file s1]

## Supplementary Material

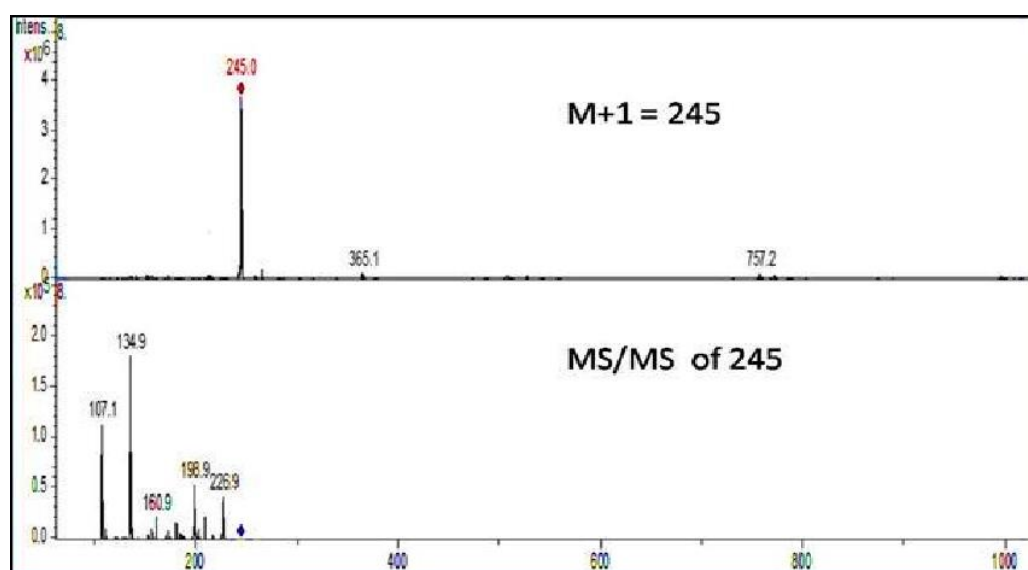

**Figure S1.** MS and MS/MS data of oxyresveratrol

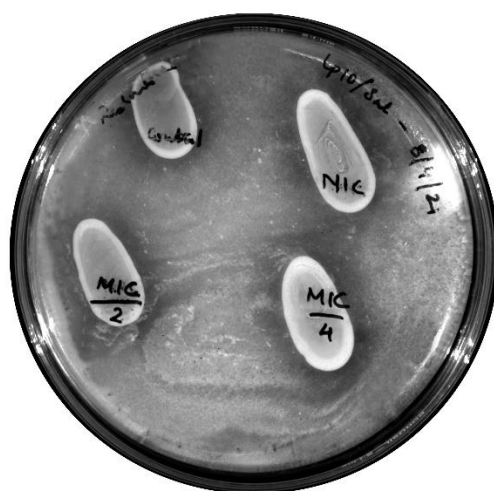

**Figure S2.** Agar spot assay indicating inhibition of *S. enterica* overlayed with different concentrations of oxyresveratrol (MIC, MIC/2 and MIC/4) with *L. fermentum* ASBT-2. Control was culture of *L. fermentum* spotted without compound.
